# Supplementary material for: Decitabine reactivated pathways in platinum resistant ovarian cancer
Source: PubMed Central journal article supplement (PMC4116504; doi:10.18632/oncotarget.1961), 2014-05-13
Supplement: oncotarget-05-3579-s002.pdf [file oncotarget-05-3579-s002.pdf]

## Decitabine reactivated pathways in platinum resistant ovarian cancer

### Supplementary Material

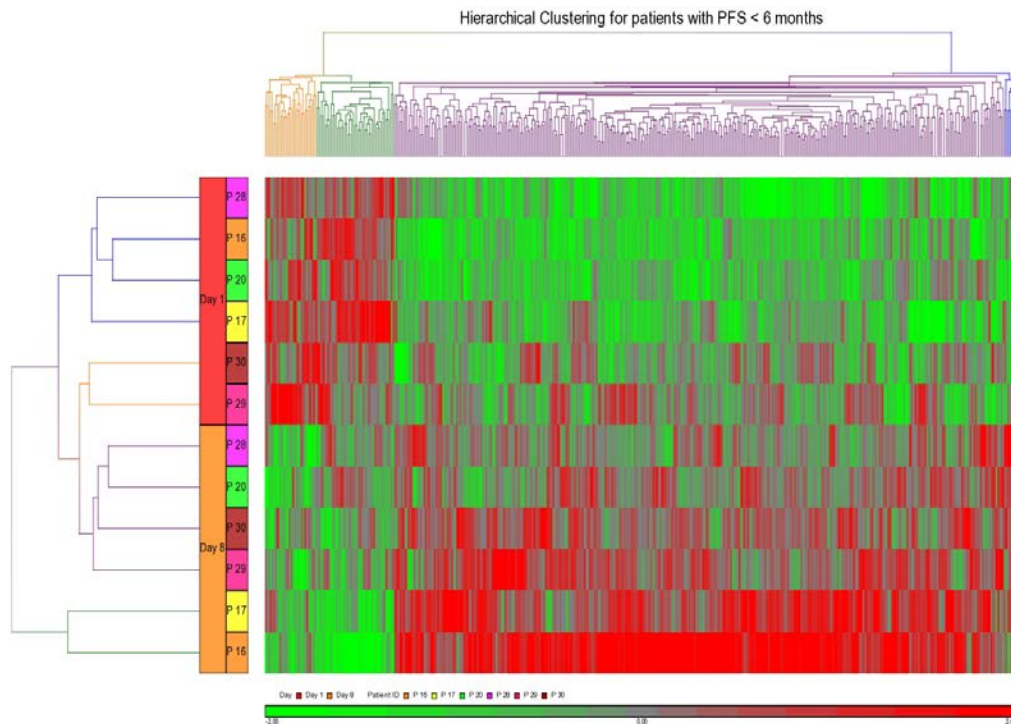

**Supplemental Figure S1:** Unsupervised clustering of differential gene expression as in (Figure 1A) of day 8 vs. day 1, in non-responsive patients (PFS < 6 months) (69 upregulated genes, 26 downregulated genes).

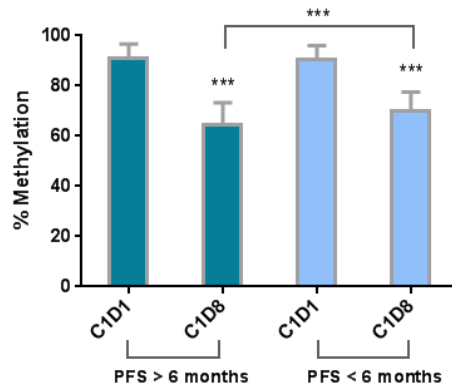

**Supplemental Figure S2:** Decitabine induces demethylation of NY-ESO-1 in OC patients' biopsies. Cycle 1 Day 1 (C1D1) represents baseline level; while C1D8 represents day 8 of the first cycle (decitabine treatment was from days 1-5). Data was reported from 7 responders (shown as PFS > 6 months) and 4 non-responders (shown as PFS < 6 months), and 15 CpG sites were analyzed (\*\*\*:  $P < 0.001$ ).

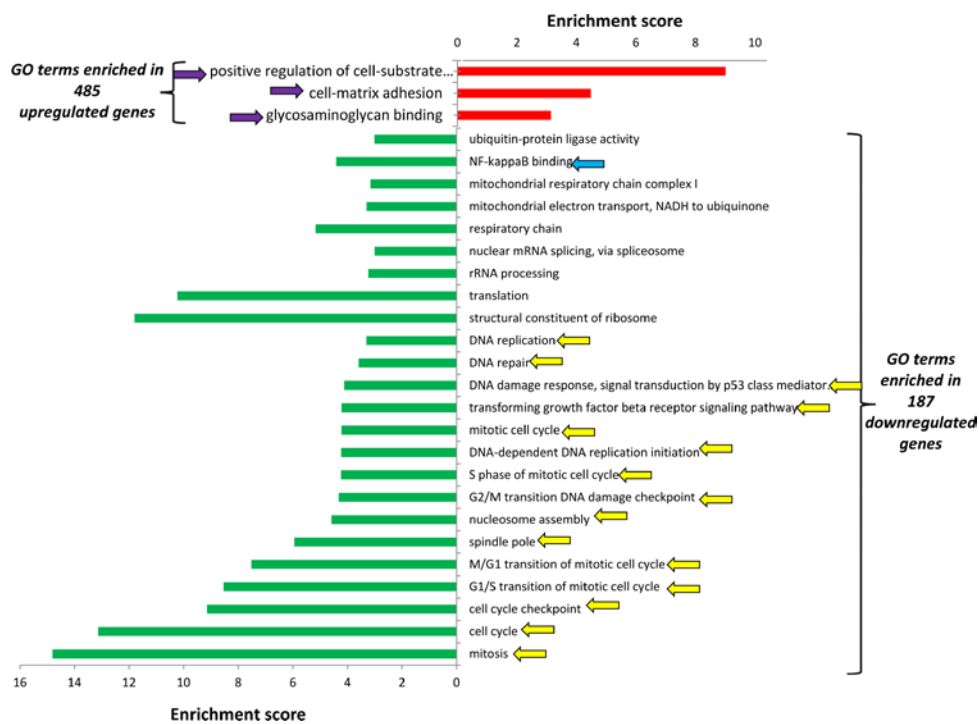

**Supplemental Figure S3:** Post-decitabine up (of 485 genes, red bars) or down (of 187 genes, green bars) -regulated Gene Ontology (GO) terms in responders. All three upregulated GO terms were related to extracellular matrix interactions (purple arrowhead), while downregulated GO terms included phenomena associated with mRNA processing/ribosomal synthesis/translation (green arrowhead), mitochondrial processes (brown arrowhead) and DNA damage/cell cycle progression (yellow arrowhead).

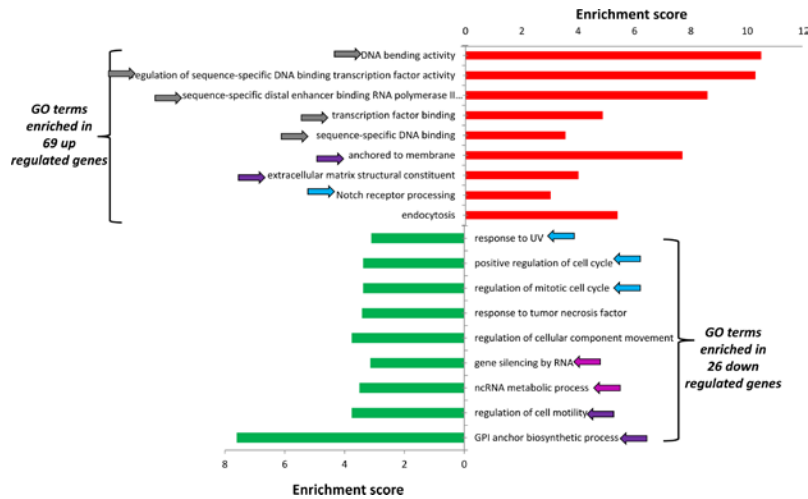

**Supplemental Figure S4:** Post-decitabine up (of 69 genes, red bars) or down (of 26 genes, green bars) -regulated GO terms in non-responsive patients (PFS < 6 months). Noteworthy upregulated cellular processes included transcriptional homeostasis/functional gene expression (gray arrowhead) and extracellular protein/cellular matrix interactions (purple arrowhead), while downregulated processes included those also associated with extracellular protein/matrix/motility interactions (blue), in addition to various noncoding-RNA-related processes (magenta), and DNA replication/repair cell cycle effects (yellow, also see SF1).

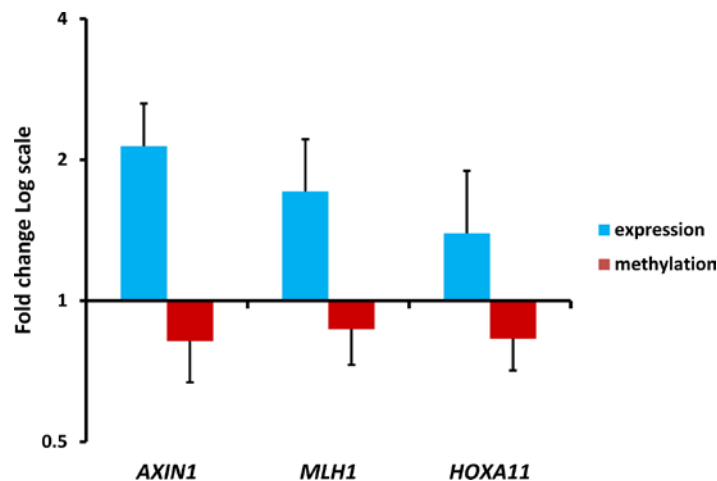

**Supplemental Figure S5:** Hypomethylation and upregulation of *AXIN1*, *MLH1*, *HOXA11* in A2780 ovarian cancer cells.  $P < 0.05$  for all data shown.

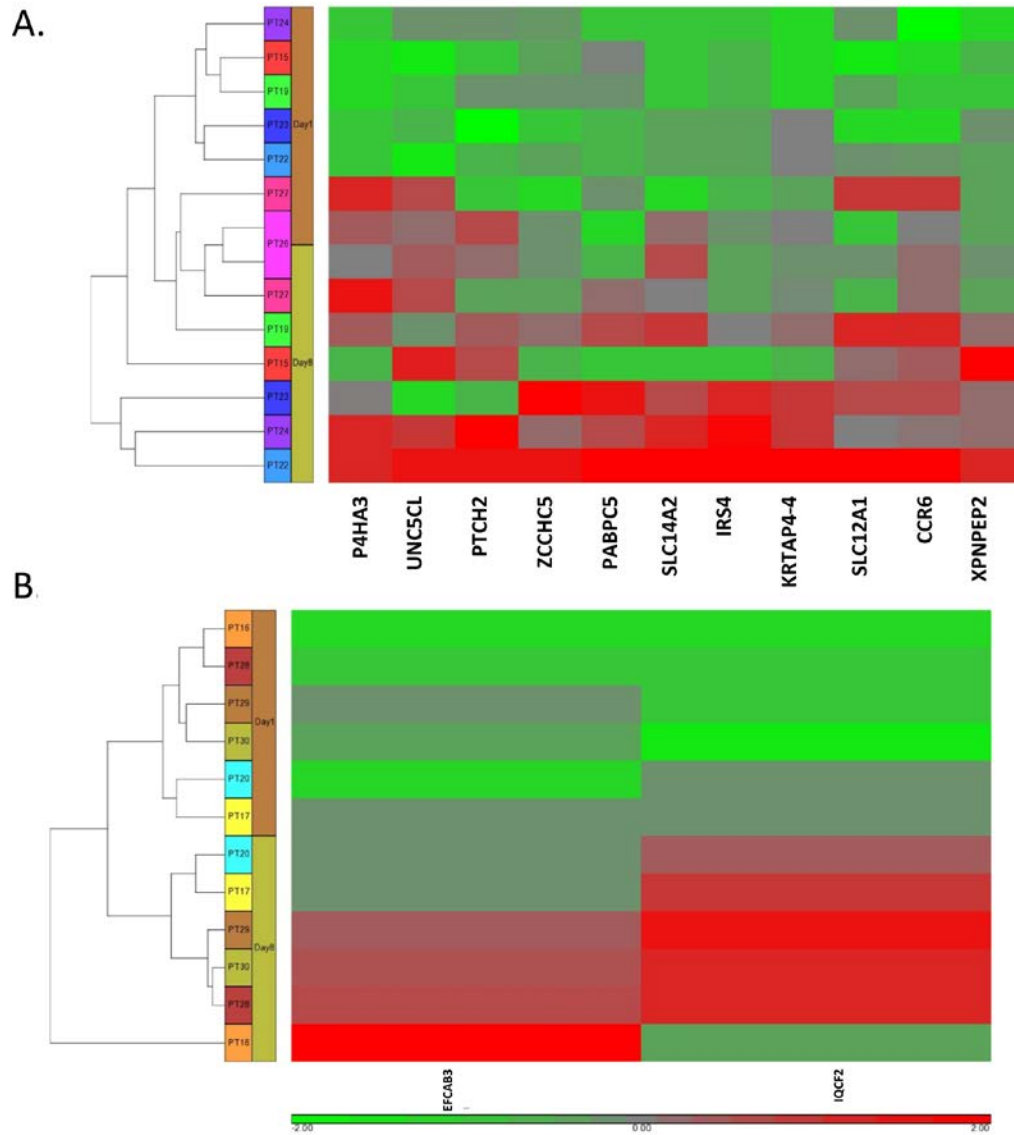

**Supplemental Figure S6:** Heatmap of unsupervised cluster analysis showing changes in expression of genes hypomethylated and upregulated on pre- (Day 1) and post- (Day 8) decitabine in patients PFS >6 months (**A**), or patients with PFS < 6 months (**B**).

**Supplemental Table ST2: Primers used for qRT-PCR.**

| <b>Genes</b>                  | <b>Forward Primers</b>     | <b>Reverse Primers</b> |
|-------------------------------|----------------------------|------------------------|
| <i>BMP5</i>                   | GCTGCTGGGTTCTAGTGGG        | TTCGTGGTTCCGTAGTCTTCTA |
| <i>WNT5B</i>                  | GCTTCTGACAGACGCCAACT       | CACCGATGATAAACATCTCGGG |
| <i>CHRD</i>                   | CTAACCCAGGTTCCCTTGAGG      | GGCAGCAATGTGTCCACTGA   |
| <i>INHBA</i>                  | CAACAGGACCAGGACCAAAGT      | GAGAGCAACAGTTCACTCCTC  |
| <i>ABC1</i>                   | TTGCTGCTTACATTCAGGTTTCA    | AGCCTATCTCCTGTTCGCATTA |
| <i>ST3GAL3</i>                | GCCTGCTGAATTAGCCACCAA      | GCCCACTTGCGAAAGGAGT    |
| <i>ECM2</i>                   | AACAAAACAAAACACTGCAATCTTCA | ATGACACCAAGCAAAGCCTAC  |
| <i>HOXA11</i>                 | AACTGAGGACAAGGCCG          | GAAGAAGAACTCCCGTTCCA   |
| <i>MLH1</i>                   | TTAATGAGCAGGGACATGAGG      | AACTTGGTTTGATGCTGTGC   |
| <i>AXIN1</i>                  | CCGGAAGACTCCCTCAGAA        | CCGGCATTGACATAATAGGG   |
| <i>EF1<math>\alpha</math></i> | GCCCCAGGACACAGAGACTTTATC   | CAACACCAGCAGCAACAATCAG |

**Supplemental Table ST3: KEGG pathways from genes significantly (P<0.05) up- (69 genes, FC>1.2) or down- (26 genes, FC<-1.2) regulated, post-decitabine, in non-responders.**

| Pathway                                                   | Enrichment Score | Enrichment P-value | Genes in Pathway (Fold-Change)                                  |
|-----------------------------------------------------------|------------------|--------------------|-----------------------------------------------------------------|
| Focal adhesion                                            | 5.08504          | 0.006189           | <i>COL4A6</i> (1.21), <i>COL11A2</i> (1.35), <i>PAK3</i> (1.30) |
| Protein digestion and absorption                          | 4.55132          | 0.010553           | <i>COL4A6</i> (1.21), <i>COL11A2</i> (1.35)                     |
| ECM-receptor interactions                                 | 4.48225          | 0.011308           | <i>COL4A6</i> (1.21), <i>COL11A2</i> (1.35)                     |
| Other types of O-glycan biosynthesis                      | 6.2702           | 0.001891           | <i>CHST10</i> (-1.37), <i>ST3GAL3</i> (-1.25)                   |
| Glycosaminoglycan biosynthesis - keratan sulfate          | 3.76784          | 0.023101           | <i>ST3GAL3</i> (-1.25)                                          |
| Glycosylphosphatidylinositol (GPI)-anchor biosynthesis    | 3.2888           | 0.037298           | <i>PIGO</i> (-1.31)                                             |
| Glycosphingolipid biosynthesis- lacto and neolacto series | 3.2888           | 0.037298           | <i>ST3GAL3</i> (-1.25)                                          |

**Supplemental Table ST4. Details of the two genes hypomethylated and upregulated in non-responders.**

| Gene   | Fold-Change (Day8 vs. Day1) | P-value | Function                |
|--------|-----------------------------|---------|-------------------------|
| IQCF2  | 1.17503                     | 0.001   | unknown                 |
| EFCAB3 | 1.18127                     | 0.020   | Calcium-binding protein |
